# Supplementary material for: Impact of the segment ratio on a donor–acceptor all-conjugated block copolymer in single-component organic solar cells
Source: Royal Society of Chemistry journal article supplement (doi:10.1039/d2nr00437b), 2022-01-01
Supplement: d2nr00437b1.pdf [file d2nr00437b1.pdf]

## Supporting Information

### Impact of segment ratio for a donor-acceptor all-conjugated block copolymer in single-component organic solar cells

*Yu-Cheng Tseng,<sup>1,†</sup> Aoto Kato,<sup>2,†</sup> Jia-Fu Chang,<sup>1</sup> Wen-Chang Chen,<sup>1,3</sup> Tomoya Higashihara<sup>2,\*</sup>  
and Chu-Chen Chueh<sup>1,3\*</sup>*

<sup>1</sup> Department of Chemical Engineering, National Taiwan University, Taipei 10617, Taiwan

<sup>2</sup> Department of Organic Materials Science, Graduate School of Organic Materials Science, Yamagata University, 4-3-16 Jonan, Yonezawa, Yamagata 992-8510, Japan

<sup>3</sup> Advanced Research Center for Green Materials Science and Technology, National Taiwan University, Taipei 10617, Taiwan.

*† These authors contributed equally to this work.*

\*Corresponding authors. E-mail: thigashihara@yz.yamagata-u.ac.jp; cchueh@ntu.edu.tw

KEYWORDS: Single-component solar cell; all-polymer solar cell; conjugated block copolymers; composition; morphology

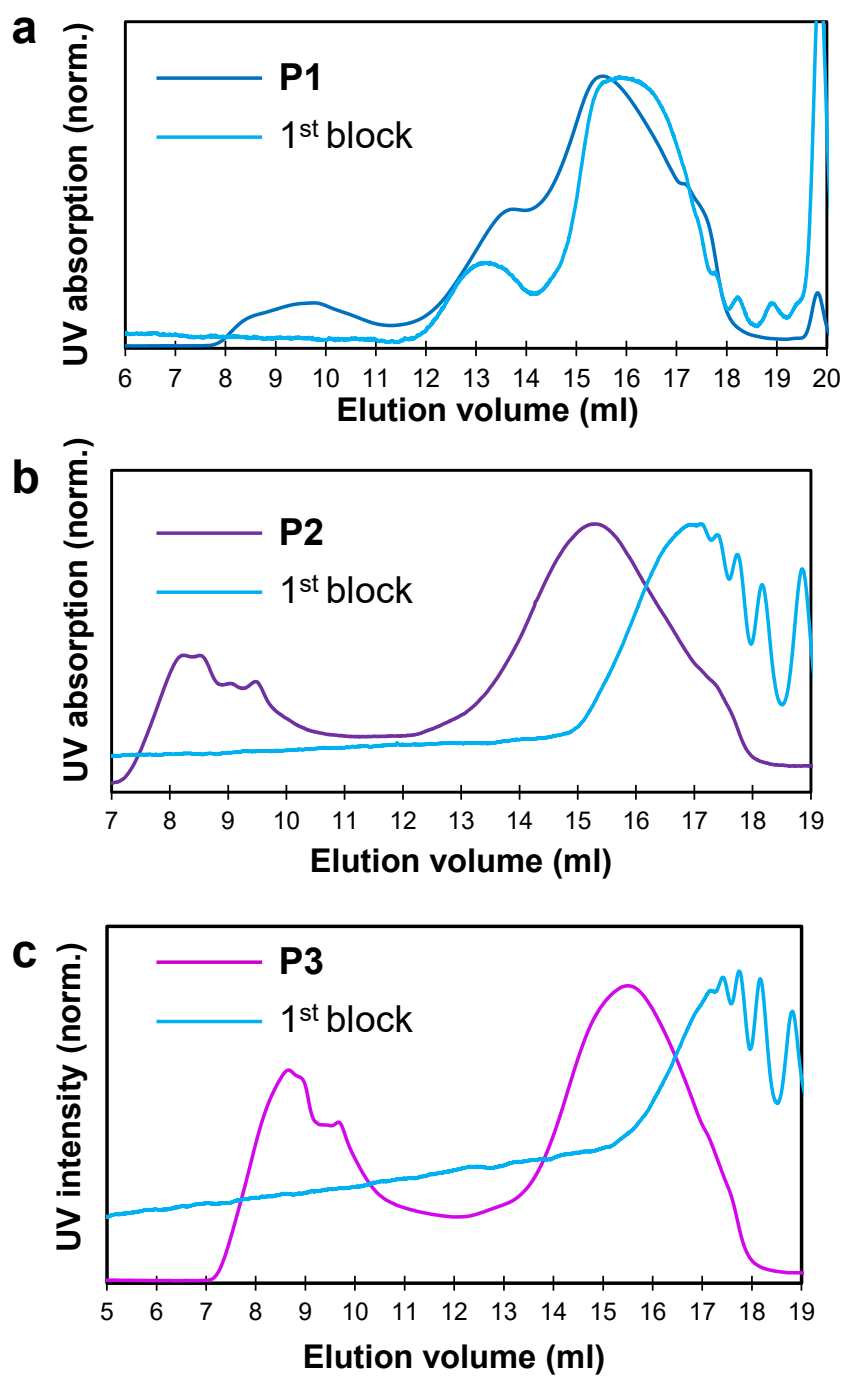

**Figure S1.** SEC UV traces of (a) P1, (b) P2, and (c) P3 together with their 1<sup>st</sup> blocks.

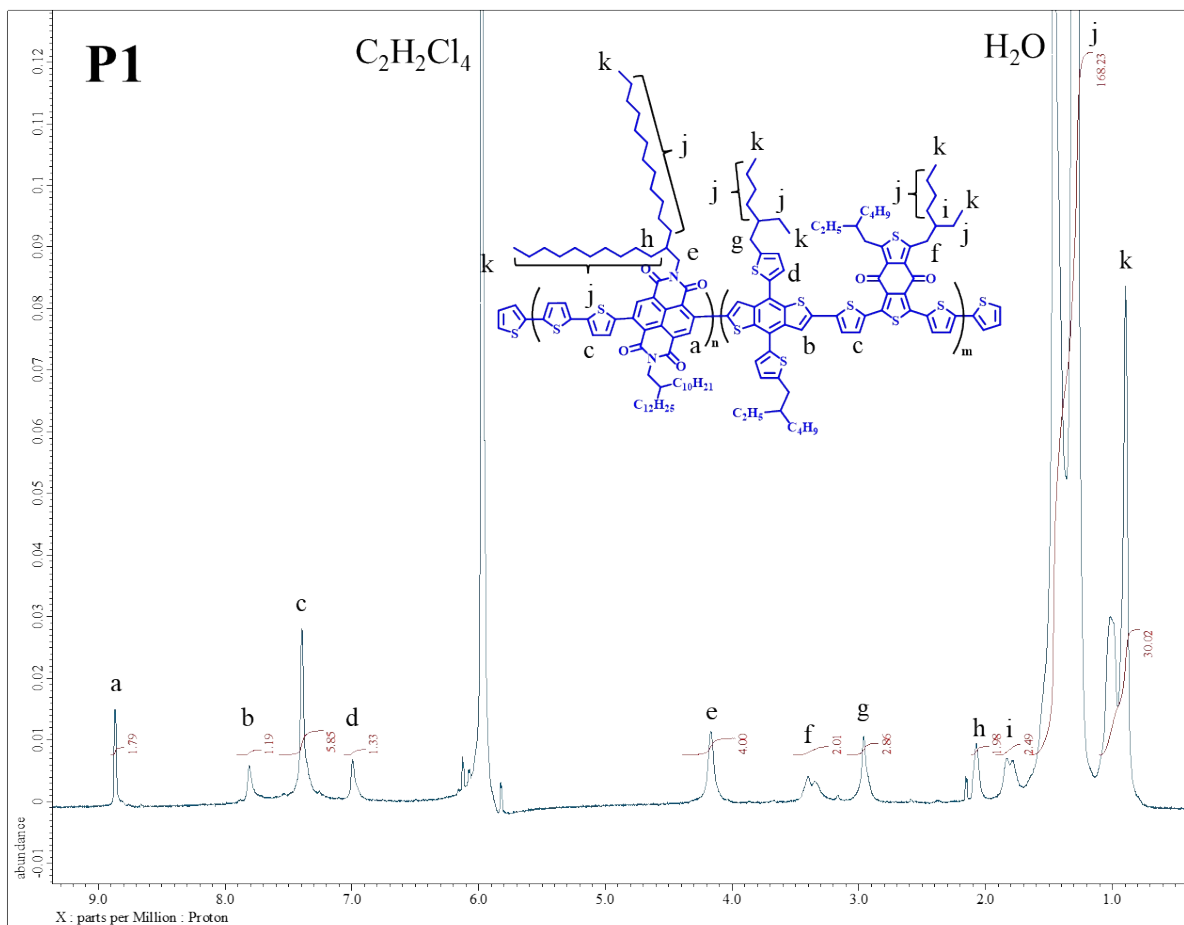

**Figure S2.**  $^1\text{H}$  NMR spectrum of **P1** in  $\text{C}_2\text{D}_2\text{Cl}_4$  at  $100\text{ }^\circ\text{C}$ .

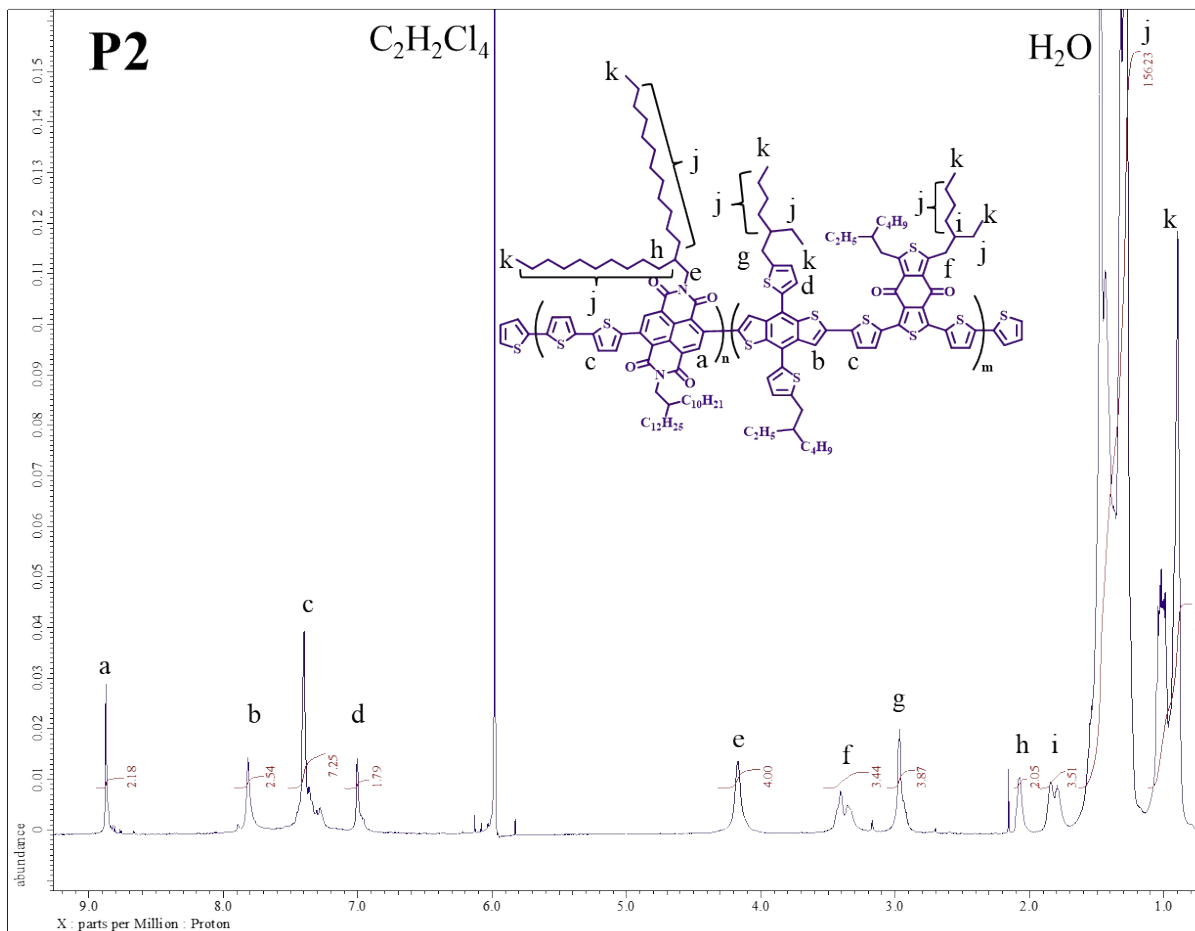

**Figure S3.**  $^1H$  NMR spectrum of **P2** in  $C_2D_2Cl_4$  at 100 °C.

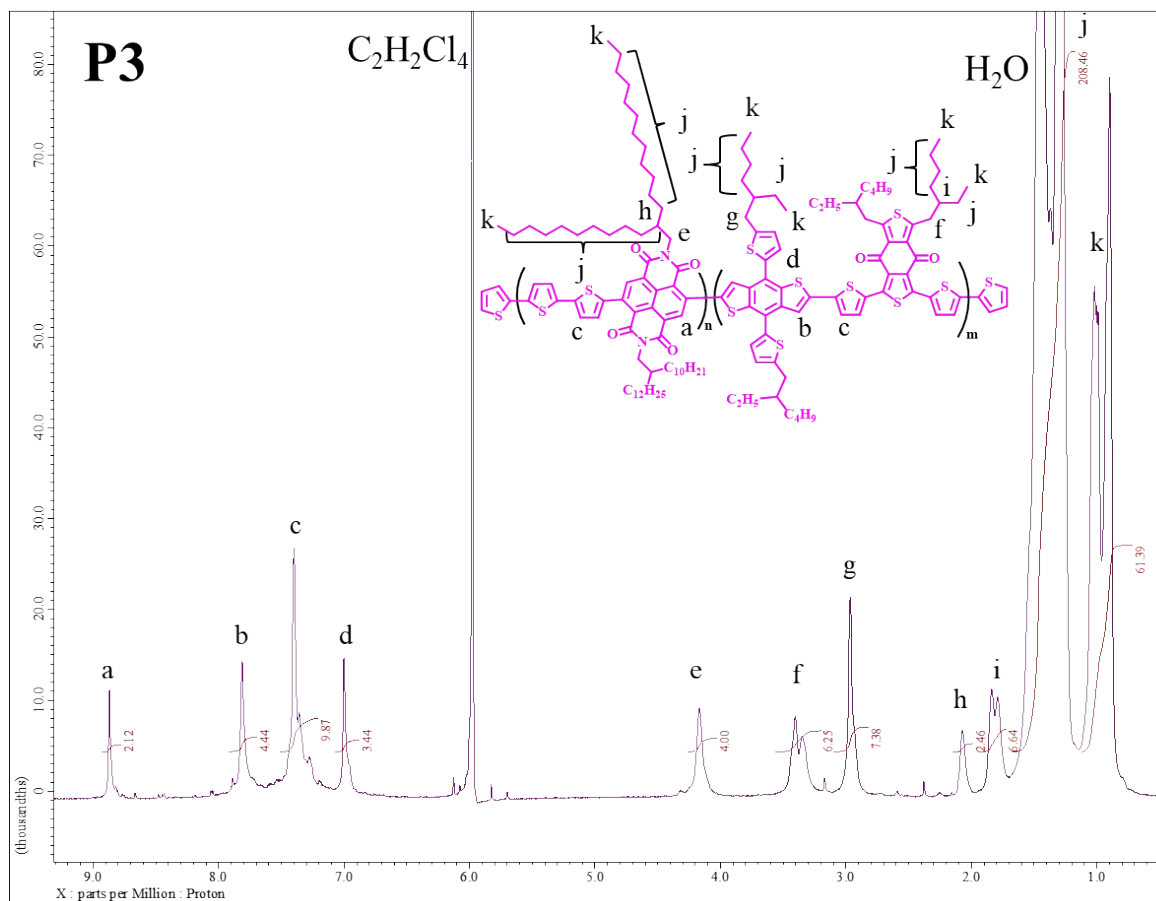

**Figure S4.**  $^1\text{H}$  NMR spectrum of **P3** in  $\text{C}_2\text{D}_2\text{Cl}_4$  at  $100\text{ }^\circ\text{C}$ .

**Table S1.** Basic characteristics of P1-P3.

| Polymer       | $M_n$ (kDa) <sup>a</sup> | $M_w$ (kDa) <sup>a</sup> | $M_w/M_n$ <sup>a</sup> | Composition <sup>b</sup> |  | $T_{d,5\%}$ ( $^\circ\text{C}$ ) <sup>c</sup> |
|---------------|--------------------------|--------------------------|------------------------|--------------------------|--|-----------------------------------------------|
|               |                          |                          |                        | (w:w)                    |  |                                               |
| PNDI2T:PBDB-T |                          |                          |                        |                          |  |                                               |
| <b>P1</b>     | 24.0                     | 74.2                     | 3.09                   | 65:35                    |  | 419                                           |
| <b>P2</b>     | 19.8 <sup>c</sup>        | 57.8 <sup>c</sup>        | 2.92 <sup>c</sup>      | 52:48                    |  | 424                                           |
| <b>P3</b>     | 18.0 <sup>c</sup>        | 43.7 <sup>c</sup>        | 2.43 <sup>c</sup>      | 38:62                    |  | 415                                           |

<sup>a</sup> Number-average molecular weight ( $M_n$ ), weight-average molecular weight ( $M_w$ ), and molecular weight distribution ( $M_w/M_n$ ) were determined by SEC eluted with chloroform at  $40\text{ }^\circ\text{C}$  based on a calibration using polystyrene standards. <sup>b</sup> Determined by  $^1\text{H}$  NMR. <sup>c</sup> 5% weight loss under a nitrogen atmosphere. <sup>c</sup> Determined by taking non-aggregated part (12.3-18.0 ml) in SEC UV traces.

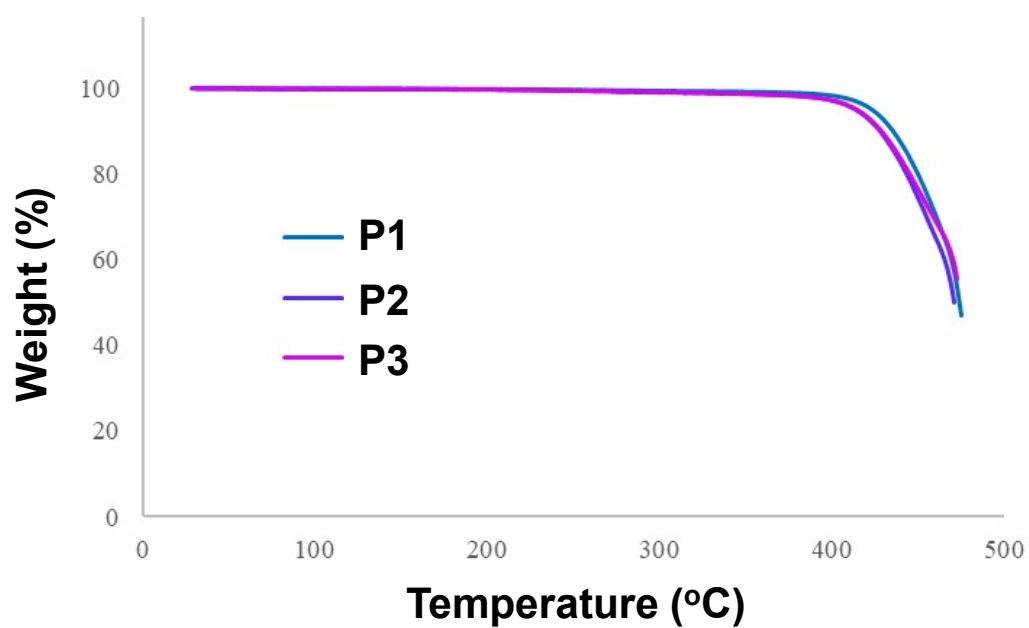

Figure S5. TGA curves of P1-P3 at a heating rate of 10 °C/min.

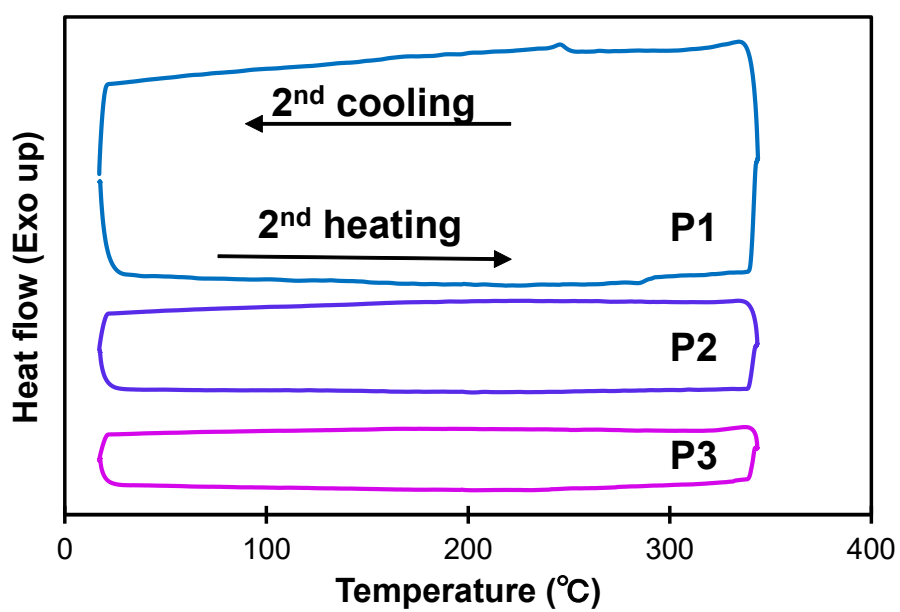

Figure S6. DSC curves of P1-P3 at a heating/cooling rate of 10°C/min.

**Table S2.** Thermal properties of P1-P3 determined by DSC.

| Polymer | $T_c$ ( $^{\circ}\text{C}$ ) <sup>a</sup> | $T_m$ ( $^{\circ}\text{C}$ ) <sup>a</sup> |
|---------|-------------------------------------------|-------------------------------------------|
| P1      | 243                                       | 286                                       |
| P2      | —                                         | —                                         |
| P3      | —                                         | —                                         |

<sup>a</sup> Determined from the 2<sup>nd</sup> heating/cooling cycles at a heating/cooling rate of 10  $^{\circ}\text{C}/\text{min}$ .

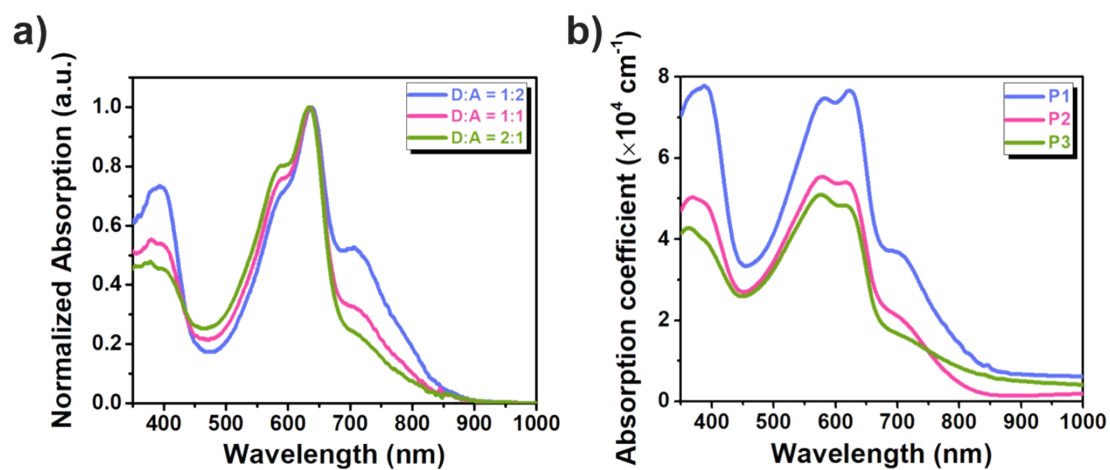

**Figure S7.** (a) Normalized UV-vis absorption spectra of the blend films with the same D:A ratios to P1-P3. (b) Absorption coefficient of the films of P1-P3.

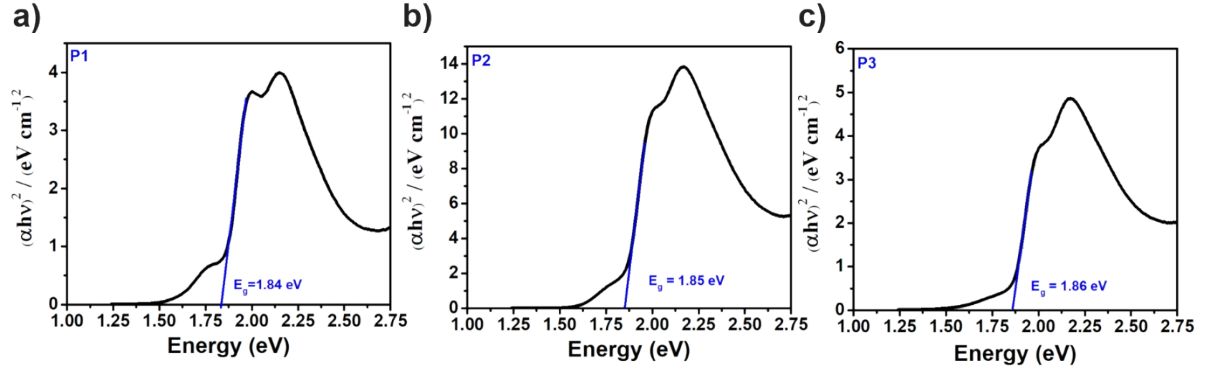

**Figure S8.** Tauc plots of (a) P1, (b) P2, and (c) P3 films. The bandgap ( $E_g$ ) values were calculated by the equation of  $(\alpha hv)^{1/n} = A(h\nu - E_g)$ , where  $h$  is the Plank constant,  $\nu$  is the photon's frequency,  $\alpha$  is the absorption coefficient, and  $A$  is a constant.<sup>1</sup>

**Table S3.** Fitting parameters obtained from triexponential reconvolution of the TRPL curves of P1-P3 films.

|                       | $A_1$ | $\tau_1$ (ns) | $A_2$ | $\tau_2$ (ns) | $A_3$ | $\tau_3$ (ps) | $\tau_{avg}$ (ps) <sup>b</sup> |
|-----------------------|-------|---------------|-------|---------------|-------|---------------|--------------------------------|
| <b>P1<sup>a</sup></b> | 0.08  | 6.10          | 0.23  | 0.773         | 0.69  | 51.5          | 677                            |
| <b>P2<sup>a</sup></b> | 0.08  | 5.74          | 0.23  | 0.765         | 0.69  | 40.4          | 649                            |
| <b>P3<sup>a</sup></b> | 0.08  | 5.08          | 0.24  | 0.725         | 0.68  | 41.7          | 619                            |

<sup>a</sup> The triexponential reconvolution fitting equation for TRPL is:

$$I(t) = \int_{-}^t IRF(t') \sum_{i=1}^3 A_i e^{-\frac{t-t'}{\tau_i}} dt' \quad .^2$$

$$\tau_{avg} = \frac{\sum_{i=1}^3 A_i \tau_i^2}{\sum_{i=1}^3 A_i \tau_i} \quad .^3$$

<sup>b</sup>  $\tau_{avg}$  is calculated by the intensity weighted average of  $\tau$ ,



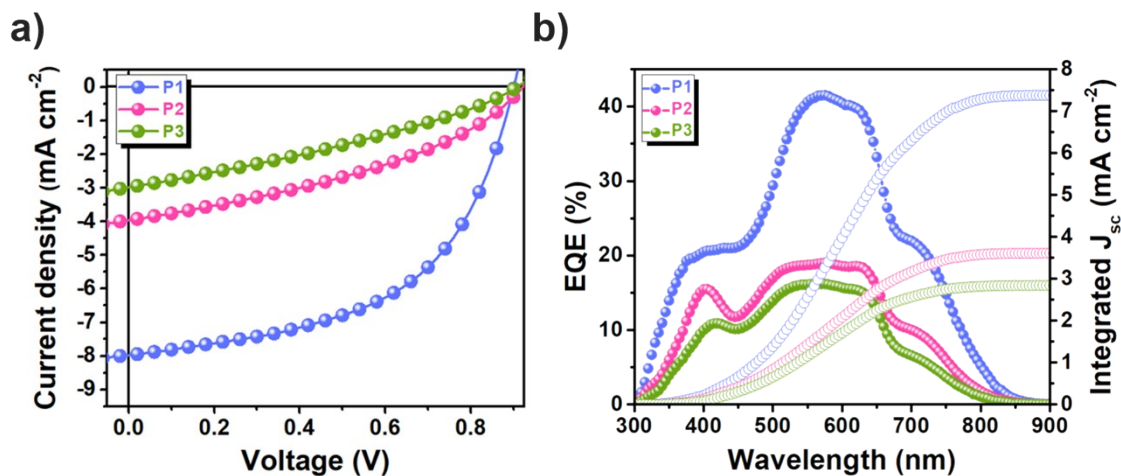

**Figure S9.** (a)  $J$ - $V$  curves and (b) EQE spectra of the fabricated SCOSC devices based on as-cast P1-P3 films.

**Table S4.** Performance of the fabricated SCOSCs based on the as-cast P1-P3 films under AM 1.5G illumination ( $100 \text{ mW cm}^{-2}$ ).<sup>a</sup>

|           | $V_{oc}$<br>(V) | $J_{sc}$<br>( $\text{mA cm}^{-2}$ ) | $J_{sc, cal}^b$<br>( $\text{mA cm}^{-2}$ ) | $FF$<br>(%)  | PCE<br>(%)  | $R_s$<br>( $\Omega$ ) | $R_{sh}$<br>( $\Omega$ ) |
|-----------|-----------------|-------------------------------------|--------------------------------------------|--------------|-------------|-----------------------|--------------------------|
| <b>P1</b> | 0.901           | 7.97                                | 7.38                                       | 53.13%       | 3.81%       | 284.33                | 7515                     |
|           | (0.890±0.011)   | (7.67±0.3)                          |                                            | (50.20±2.93) | (3.43±0.38) | (358.98±74.65)        | (7080±435)               |
| <b>P2</b> | 0.922           | 3.96                                | 3.61                                       | 37.98%       | 1.38%       | 985.9                 | 5893                     |
|           | (0.886±0.036)   | (3.84±0.12)                         |                                            | (37.50±0.48) | (1.27±0.11) | (1185±200.9)          | (5440±453)               |
| <b>P3</b> | 0.908           | 2.99                                | 2.84                                       | 31.89%       | 0.87%       | 1813.6                | 5469                     |
|           | (0.903±0.005)   | (2.91±0.08)                         |                                            | (31.55±0.34) | (0.83±0.04) | (1927±113.4)          | (5459±10)                |

<sup>a</sup> The average values were obtained from more than 10 devices. <sup>b</sup>  $J_{sc, cal}$  represent the integrated  $J_{sc}$  obtained from EQE spectra.

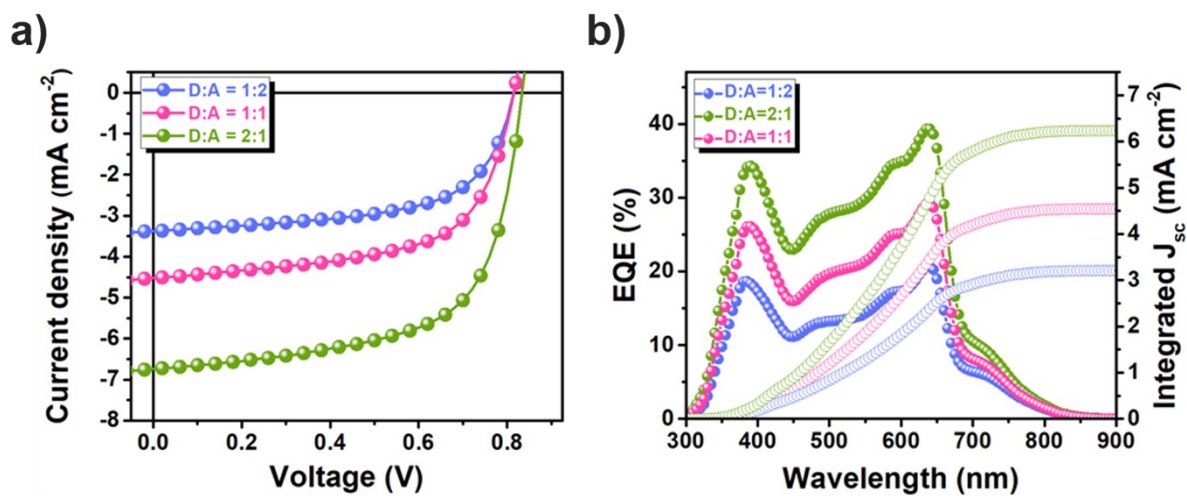

**Figure S10.** (a) The  $J$ - $V$  curves and (b) EQE spectra of the devices based on the blend films with the same D:A ratios to P1-P3.

**Table S5.** Performance of the devices based on the blend films with the same D:A ratios to P1-P3 under AM 1.5G illumination (100 mW cm<sup>-2</sup>).

| D:A | $V_{oc}$<br>(V) | $J_{sc}$<br>(mA cm <sup>-2</sup> ) | $J_{sc, cal}^a$<br>(mA cm <sup>-2</sup> ) | $FF$<br>(%) | PCE<br>(%) |
|-----|-----------------|------------------------------------|-------------------------------------------|-------------|------------|
| 1:2 | 0.814           | 3.41                               | 3.21                                      | 61.9%       | 1.65%      |
| 1:1 | 0.815           | 4.52                               | 4.50                                      | 61.4%       | 2.26%      |
| 2:1 | 0.833           | 6.74                               | 6.24                                      | 63.6%       | 3.57%      |

<sup>a</sup>  $J_{sc, cal}$  represents the integrated  $J_{sc}$  obtained from EQE spectra.

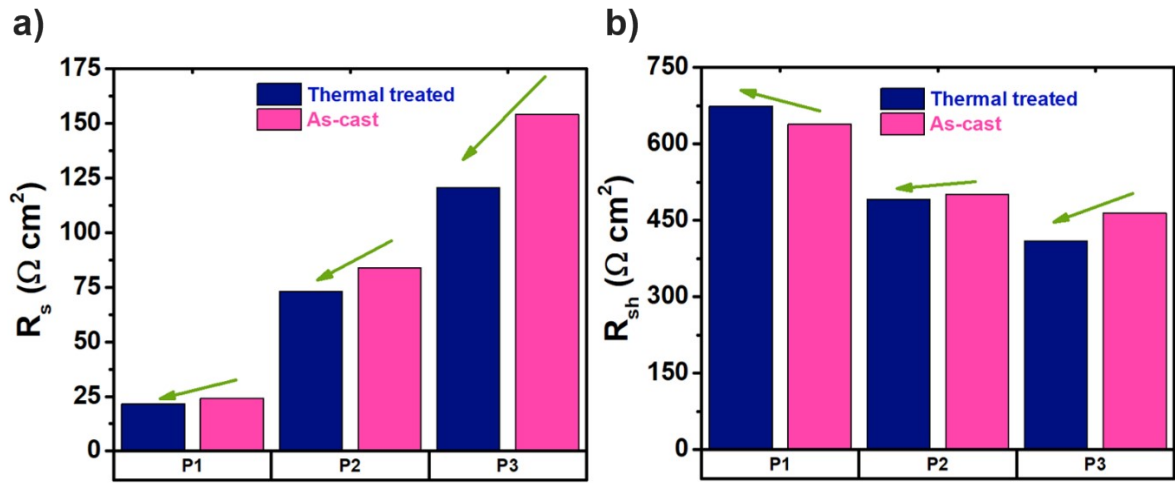

**Figure S11.** Changes of (a) series resistance ( $R_s$ ) and (b) shunt resistance ( $R_{sh}$ ) for the fabricated SCOSCs based on the as-cast films or the annealed films (at 100 °C).

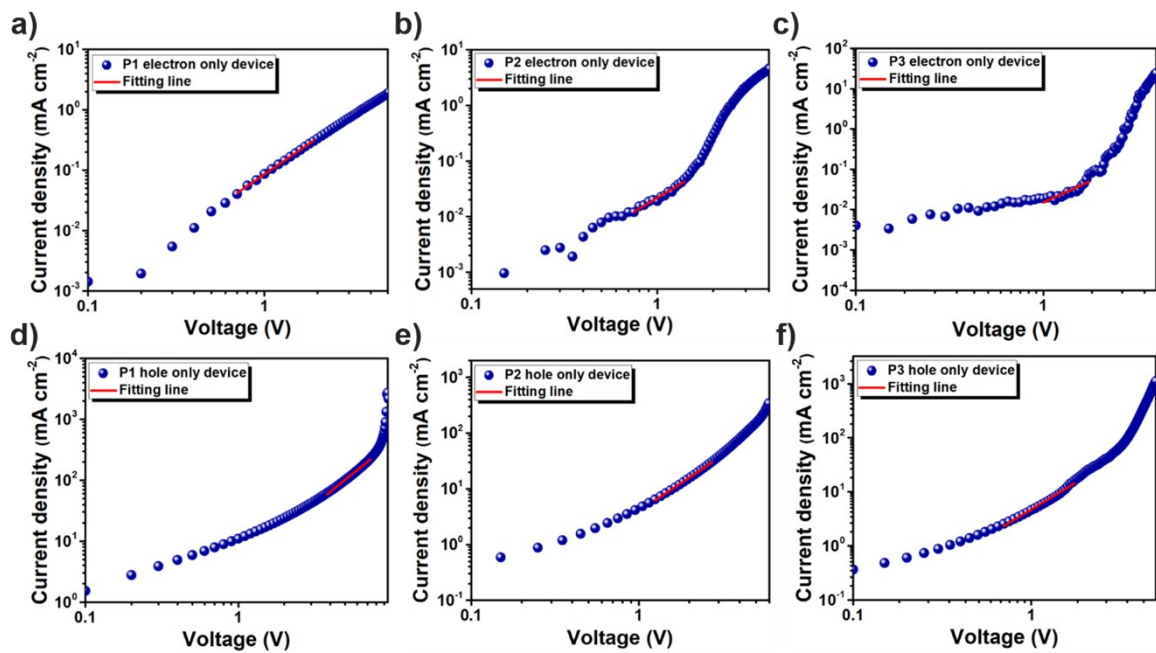

**Figure S12.** The SCLC curves for (a) P1-, (b) P2-, and (c) P3-based electron-only devices and

(d) P1-, (e) P2-, and (f) P3-based hole-only devices.

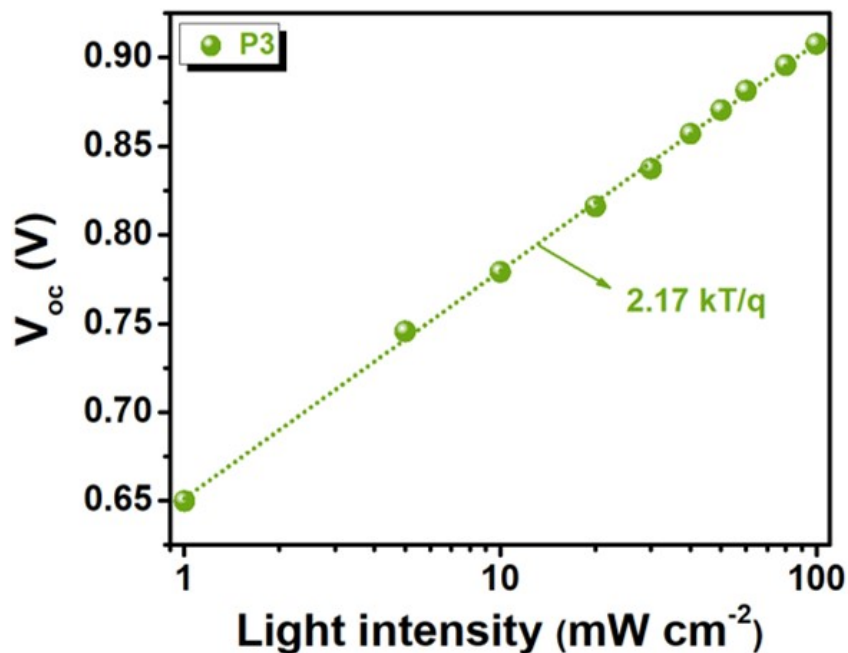

**Figure S13.** The relationship of  $V_{oc}$  on light intensity for P3 devices.

**Table S6.** Detailed parameters of energy loss for P1 and P2 devices.

|           | $E_g$<br>(eV) <sup>a</sup> | $EQE_{EL}$           | $qV_{oc}^{SQ}$<br>(eV) | $qV_{oc}^{rad}$<br>(eV) | $\Delta E_{total}$<br>(eV) <sup>b</sup> | $\Delta E_1$<br>(eV) | $\Delta E_2$<br>(eV) | $\Delta E_3$<br>(eV) | $E_{loss}$<br>(eV) <sup>c</sup> |
|-----------|----------------------------|----------------------|------------------------|-------------------------|-----------------------------------------|----------------------|----------------------|----------------------|---------------------------------|
| <b>P1</b> | 1.656                      | $3.05 \cdot 10^{-5}$ | 1.379                  | 1.208                   | 0.757                                   | 0.277                | 0.171                | 0.269                | 0.717                           |
| <b>P2</b> | 1.653                      | $1.87 \cdot 10^{-5}$ | 1.375                  | 1.187                   | 0.765                                   | 0.278                | 0.188                | 0.280                | 0.746                           |

<sup>a</sup> Determined from FTPS-EQE. <sup>b</sup> Determined from the difference between  $E_g$  from FTPS-EQE and  $V_{oc}$  from  $J$ - $V$  characteristic. <sup>c</sup> Calculated by the summation of  $\Delta E_1$ ,  $\Delta E_2$ , and  $\Delta E_3$ .

**Table S7.** 1D GIWAXS parameters of **P1-P3** and pure segments at out-of-plane direction.

| <b>Polymer</b> | <b>Peak</b> | <b><math>q</math> (<math>\text{\AA}^{-1}</math>)</b> | <b><math>d</math>-spacing<br/>(<math>\text{\AA}</math>)</b> | <b>FWHM<br/>(<math>\text{\AA}</math>)</b> | <b>Coherence length<br/>(<math>\text{\AA}</math>)</b> |
|----------------|-------------|------------------------------------------------------|-------------------------------------------------------------|-------------------------------------------|-------------------------------------------------------|
| <b>PBDB-T</b>  | (100)       | 0.27                                                 | 23.26                                                       | 0.19                                      | 33.07                                                 |
|                | (010)       | 1.65                                                 | 3.81                                                        | 0.38                                      | 16.53                                                 |
| <b>P3</b>      | (100)       | 0.25                                                 | 25.12                                                       | 0.20                                      | 31.42                                                 |
|                | (010)       | 1.65                                                 | 3.81                                                        | 0.39                                      | 16.11                                                 |
| <b>P2</b>      | (100)       | 0.27                                                 | 23.26                                                       | 0.19                                      | 33.07                                                 |
|                | (010)       | 1.63                                                 | 3.85                                                        | 0.39                                      | 16.11                                                 |
| <b>P1</b>      | (100)       | ---                                                  | ---                                                         | ---                                       | ---                                                   |
|                | (010)       | 1.61                                                 | 3.90                                                        | 0.39                                      | 16.11                                                 |
| <b>PNDI2T</b>  | (100)       | 0.17                                                 | 36.94                                                       | 0.14                                      | 36.96                                                 |
|                | (010)       | 1.60                                                 | 3.93                                                        | 0.16                                      | 39.27                                                 |

**Table S8.** 1D GIWAXS parameters of **P1-P3** and pure segments at in-plane direction.

| <b>Polymer</b> | <b>Peak</b>        | <b><math>q</math> (<math>\text{\AA}^{-1}</math>)</b> | <b><math>d</math>-spacing<br/>(<math>\text{\AA}</math>)</b> | <b>FWHM<br/>(<math>\text{\AA}</math>)</b> | <b>Coherence length<br/>(<math>\text{\AA}</math>)</b> |
|----------------|--------------------|------------------------------------------------------|-------------------------------------------------------------|-------------------------------------------|-------------------------------------------------------|
| <b>PBDB-T</b>  | (100)              | 0.29                                                 | 21.66                                                       | 0.11                                      | 57.12                                                 |
|                | (200)              | 0.65                                                 | 6.99                                                        | 0.11                                      | 57.12                                                 |
|                | (010)              | 1.30                                                 | 4.83                                                        | 0.84                                      | 7.48                                                  |
| <b>P3</b>      | (100)              | 0.27                                                 | 23.26                                                       | 0.09                                      | 69.81                                                 |
|                | (200) <sup>a</sup> | 0.44                                                 | 14.27                                                       | 0.14                                      | 44.88                                                 |
|                | (200) <sup>b</sup> | 0.65                                                 | 9.66                                                        | 0.09                                      | 69.81                                                 |
|                | (010)              | 1.36                                                 | 4.62                                                        | 0.40                                      | 15.71                                                 |
| <b>P2</b>      | (100)              | 0.26                                                 | 24.15                                                       | 0.08                                      | 78.54                                                 |
|                | (200) <sup>a</sup> | 0.46                                                 | 13.65                                                       | 0.09                                      | 69.81                                                 |
|                | (200) <sup>b</sup> | 0.65                                                 | 9.66                                                        | 0.11                                      | 57.12                                                 |
|                | (010)              | 1.37                                                 | 4.58                                                        | 0.37                                      | 16.98                                                 |
| <b>P1</b>      | (100)              | 0.26                                                 | 24.15                                                       | 0.07                                      | 89.76                                                 |
|                | (200) <sup>a</sup> | 0.47                                                 | 13.36                                                       | 0.06                                      | 104.72                                                |
|                | (200) <sup>b</sup> | 0.65                                                 | 9.66                                                        | 0.06                                      | 104.72                                                |
|                | (010)              | 1.33                                                 | 4.72                                                        | 0.42                                      | 14.96                                                 |
| <b>PNDI2T</b>  | (100)              | 0.24                                                 | 26.17                                                       | 0.03                                      | 209.44                                                |
|                | (200)              | 0.47                                                 | 13.36                                                       | 0.05                                      | 125.66                                                |
|                | (300)              | 0.69                                                 | 9.10                                                        | 0.08                                      | 78.54                                                 |
|                | (010)              | 1.33                                                 | 4.72                                                        | 0.26                                      | 24.17                                                 |

<sup>a</sup> (200) peaks of P1-P3 originate from the PNDI2T block; <sup>b</sup> (200) peaks principally stem from the PBDB-T block.

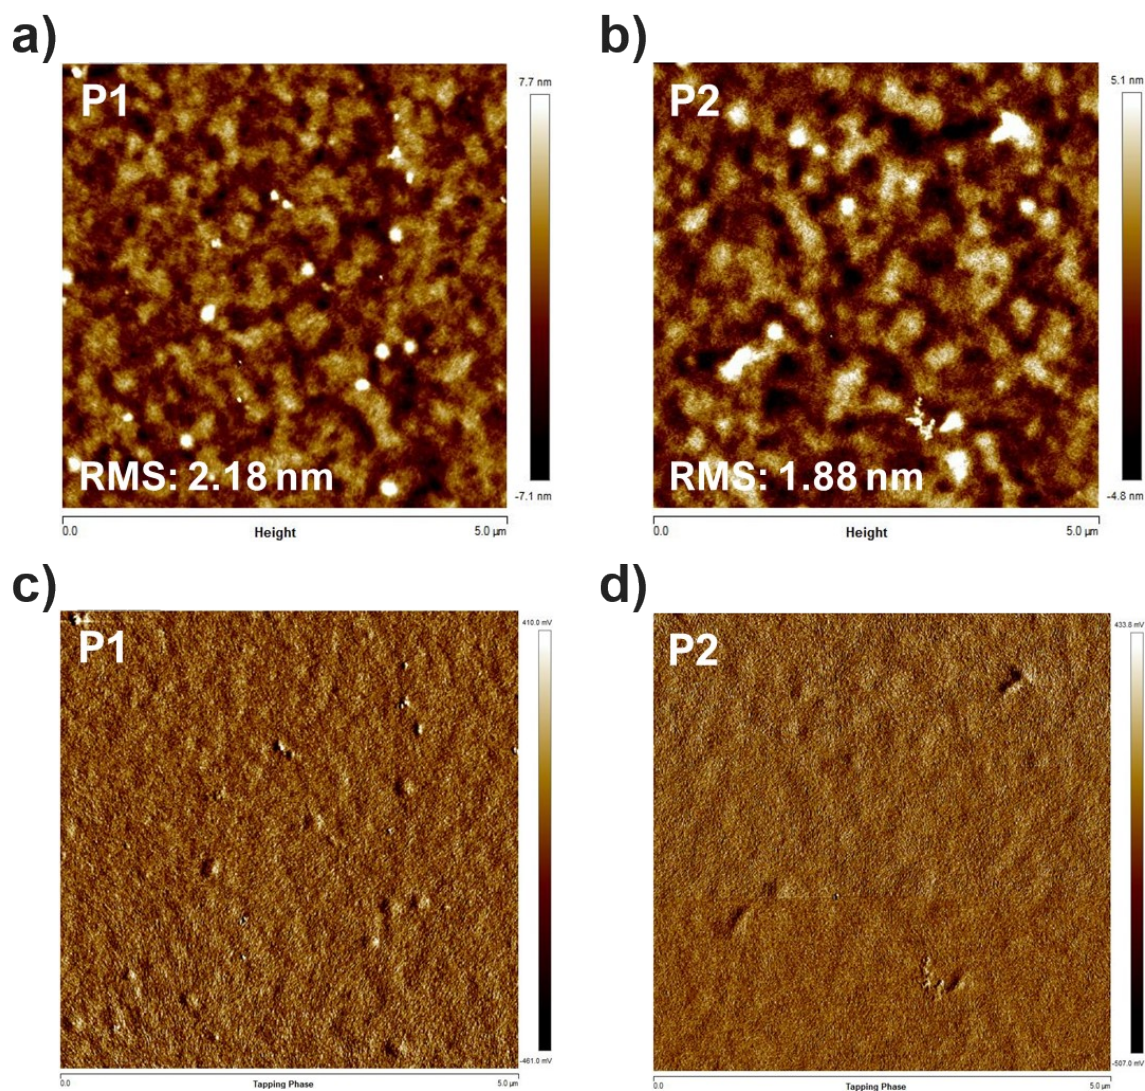

**Figure S14.** The AFM (a, b) height images ( $5\ \mu\text{m} \times 5\ \mu\text{m}$ ) and (c, d) phase images ( $5\ \mu\text{m} \times 5\ \mu\text{m}$ ) of the P1 and P2 films spin-coated on the ZnO ETL and annealed at  $100\ ^\circ\text{C}$  for 10 min.

## REFERENCE

1. P. Makuła, M. Pacia and W. Macyk, *J. Phys. Chem. Lett.*, 2018, **9**, 6814-6817.
2. A. Classen, C. L. Chochos, L. Lüer, V. G. Gregoriou, J. Wortmann, A. Osvet, K. Forberich, I. McCulloch, T. Heumüller and C. J. Brabec, *Nat. Energy*, 2020, **5**, 711-719.
3. E. Fišerová and M. Kubala, *J. lumin.*, 2012, **132**, 2059-2064.
